# Supplementary material for: Succinate receptor GPR91 provides a direct link between high glucose levels and renin release in murine and rabbit kidney
Source: JCI journal article supplement (doi:10.1172/jci33293), 2008-06-01
Supplement: sd1 [file 1]

## Supplement Figure 1

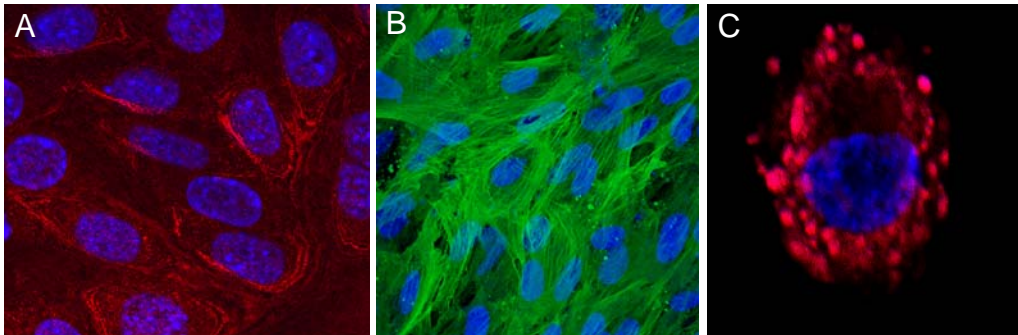

**Supplementary Fig. 1:** Immunocytochemistry of GENCs (A), mouse primary vascular smooth muscle cells (B) and JG cells (C). GENCs labeled positive for the endothelial cell marker CD31 (red). VSMCs stained positively with an antibody against  $\alpha$ -smooth muscle actin (green), but were devoid of renin. JG cells were labeled with a renin antibody (red), but did not express  $\alpha$ -smooth muscle actin. Nuclei were stained blue with DAPI.

## Supplement Figure 2

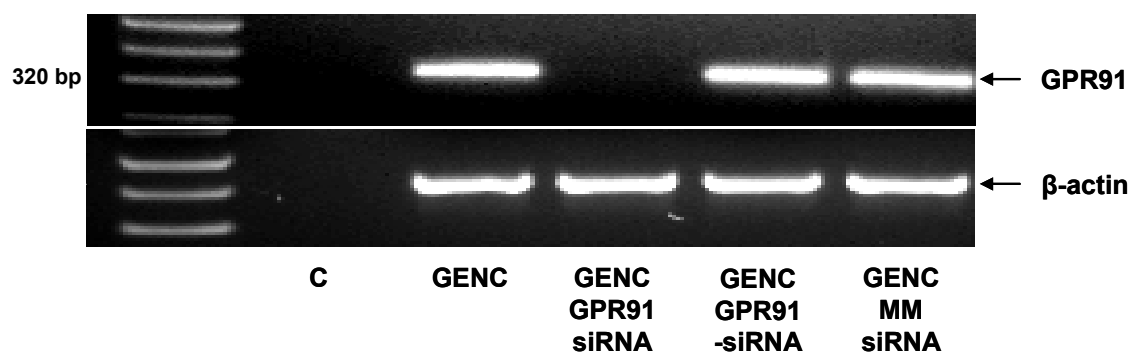

**Supplementary Fig. 2:** RT-PCR demonstrating the efficient silencing of GPR91 expression in cultured GENCs using siRNA. Control (C): mix with no cDNA; GENC: glomerular endothelial cells; -siRNA: transfection reagents without siRNA; MM: mismatch.
